# Supplementary material for: Genome-Wide Identification of Candidate Genes for Milk Production Traits in Korean Holstein Cattle
Source: MDPI journal article supplement (doi:10.3390/ani11051392), 2021-05-13
Supplement: s1 [file s1]

# Genome-Wide Identification of Candidate Genes for Milk Production Traits in Korean Holstein Cattle

Sangwook Kim <sup>1,†</sup>, Byeonghwi Lim <sup>1,†</sup>, Joohyeon Cho <sup>2</sup>, Seokhyun Lee <sup>2</sup>, Chang-Gwon Dang <sup>3</sup>, Jung-Hwan Jeon <sup>4</sup>, Jun-Mo Kim <sup>1,\*</sup> and Jungjae Lee <sup>1,\*</sup>

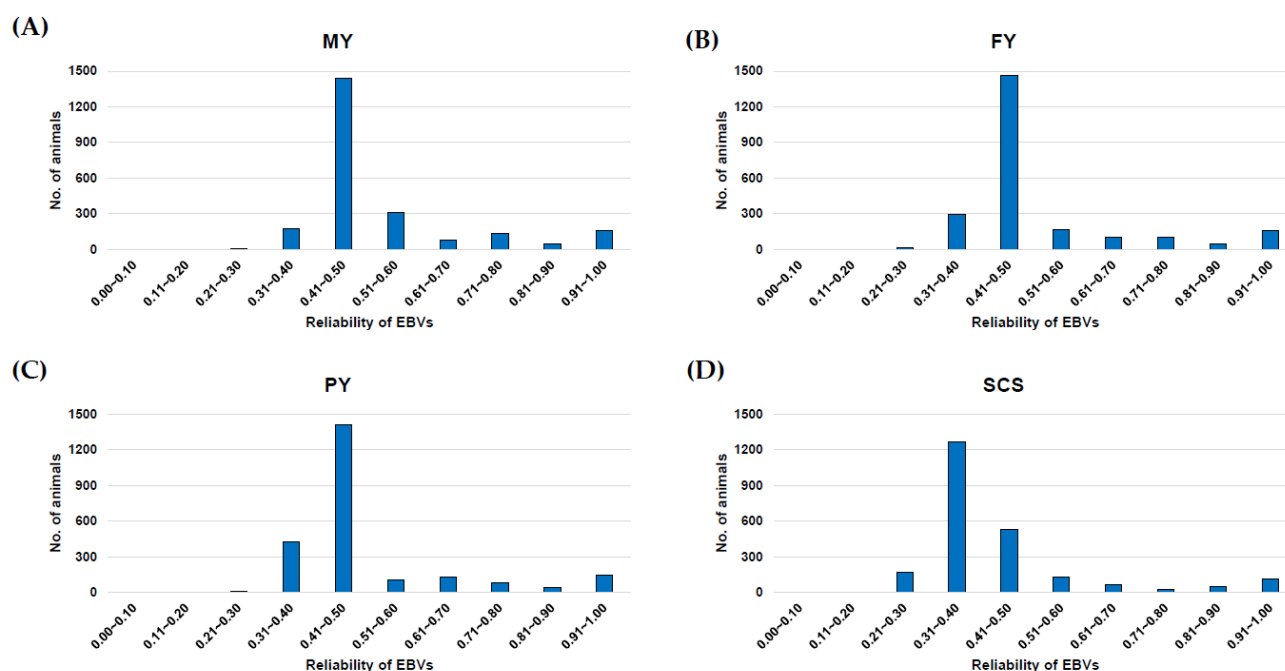

**Figure S1.** The distribution for reliabilities of EBVs in each phenotype: (A) MY, (B) FY, (C) PY, and (D) SCS.

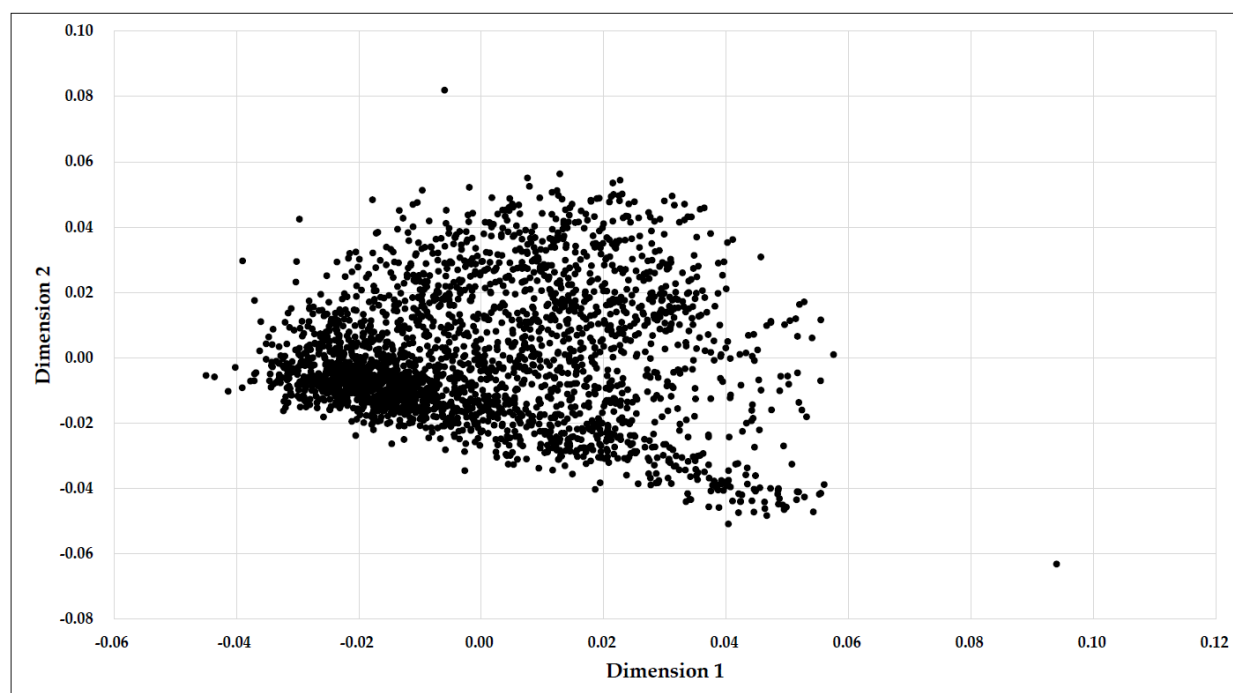

**Figure S2.** Multidimensional scaling (MDS) plot based on SNPs for Korean Holstein population.

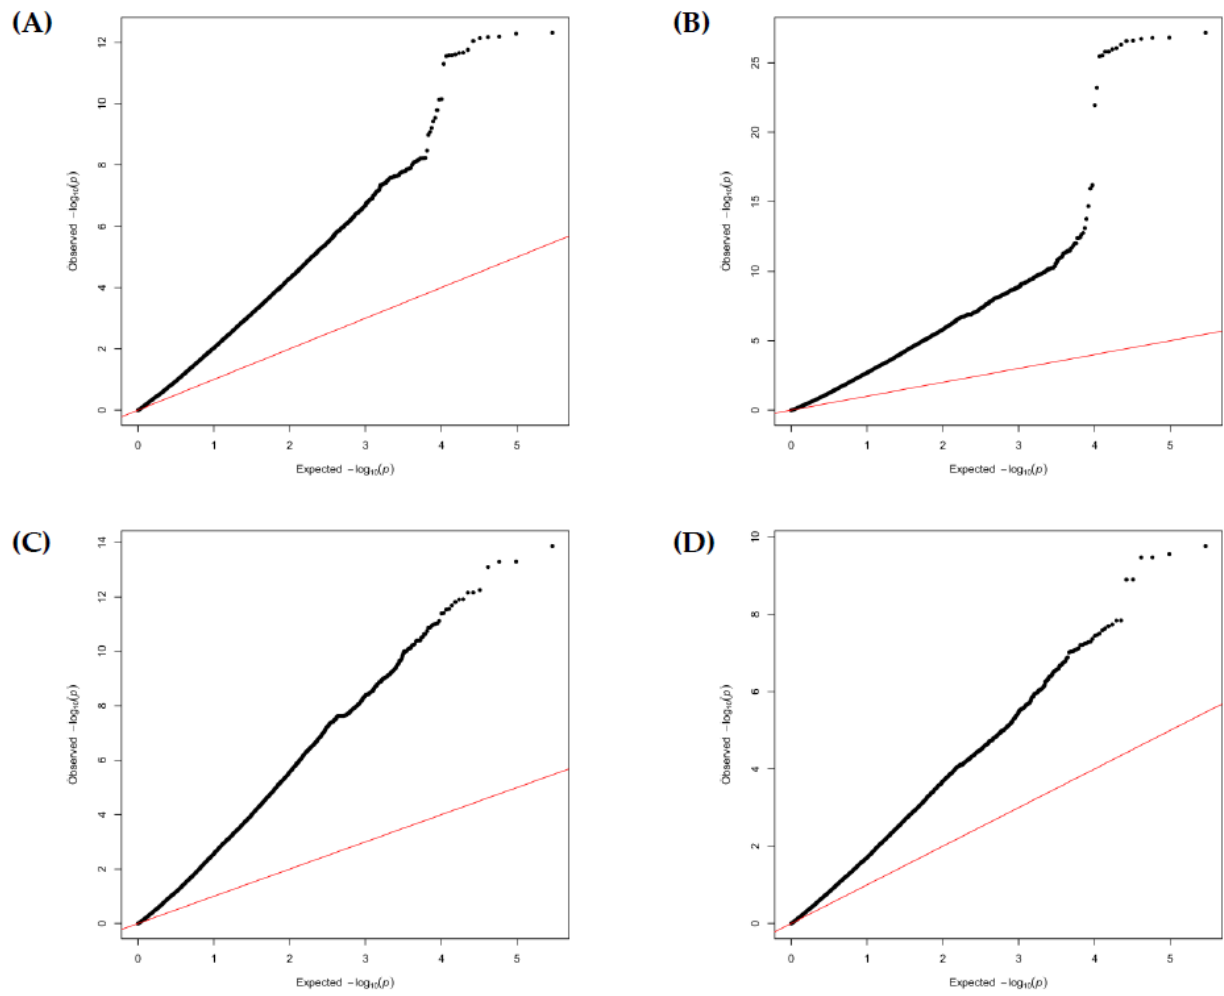

**Figure S3.** Quantile-Quantile (Q-Q) plots for 4 milk production phenotypes based on single marker regression (SMR). (A) Q-Q plot for MY. (B) Q-Q plot for FY. (C) Q-Q plot for PY. (D) Q-Q plot for SCS.

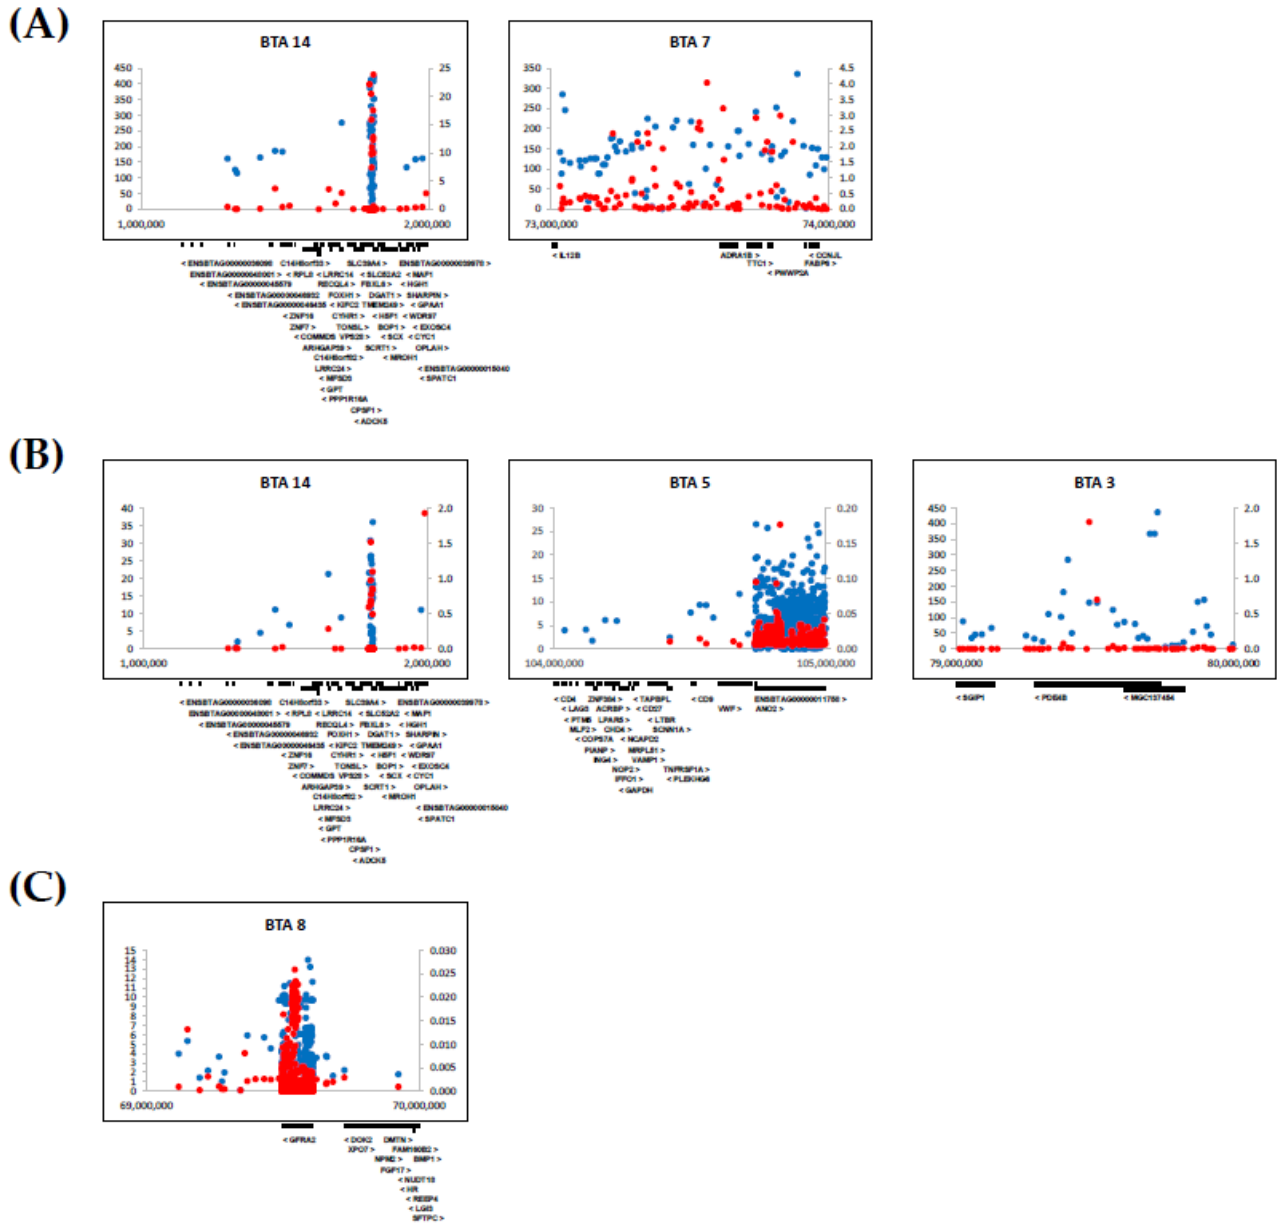

**Figure S4.** Visualization of the fine mapping in common significant regions by genome-wide association studies (GWAS) based on single marker regression (SMR) and Bayesian C (BayesC). **(A)** Common significant regions for MY. **(B)** Common significant regions for FY. **(C)** Common significant region for PY. Left Y- and Right Y-axis present effect ( $\beta$ , blue) in SMR and 1-Mb window genetic variance (red) in BayesC, respectively. Genes included in 1-Mb windows were annotated.
